# Supplementary material for: Lanthanide metal–organic frameworks based on the 4,4′-oxybisbenzoic acid ligand: synthesis, structures and physical properties
Source: Royal Society of Chemistry journal article supplement (doi:10.1039/c5nj01930c), 2015-01-01
Supplement: c5nj01930c1.pdf [file c5nj01930c1.pdf]

## **Lanthanide Metal–Organic Frameworks Based on 4,4'-oxybisbenzoic acid ligand: Synthesis, Structures and Physical Properties**

Yun Li<sup>a</sup>, Ning Wang<sup>b</sup>, Yan-Ju Xiong<sup>a</sup>, Qian Cheng<sup>a</sup>, Jie-Fang Fang<sup>a</sup>, Fei-Fei Zhu<sup>a</sup>, Yi Long<sup>b</sup>,  
Shan-Tang Yue<sup>a\*</sup>

<sup>a</sup>*School of Chemistry and Environment, South China Normal University, Guangzhou 510006,  
PR China*

<sup>b</sup>*School of Materials Science and Engineering, Nanyang Technological University, Singapore  
639798*

*To whom correspondence should be addressed. E-mail: yuesht@scnu.edu.cn;  
Tel./fax: +86 20 39310187.*

### **Supporting Information**

- (1) Table of crystal data and structure refinement for 1-6**
- (2) Table of crystal data and structure refinement for 7-8**
- (3) Table of Selected bond lengths (Å) for complexes 1, 2, 5, 6, 7 and 8**
- (4) Figures of the metal- chains and two-dimensional layer structures in 1 and 7**
- (5) TG/DTA curves for 1-8**
- (6) IR of 1-8**

**Table S1. Crystal Data and Structure Refinement Summary for compounds 1–6**

| complex                                 | 1                                                                                 | 2                                                                                 | 3                                                                                 | 4                                                                                 | 5                                                                                 | 6                                                                                 |
|-----------------------------------------|-----------------------------------------------------------------------------------|-----------------------------------------------------------------------------------|-----------------------------------------------------------------------------------|-----------------------------------------------------------------------------------|-----------------------------------------------------------------------------------|-----------------------------------------------------------------------------------|
| empirical formula                       | C <sub>93</sub> H <sub>77</sub> O <sub>37</sub> N <sub>3</sub><br>Nd <sub>4</sub> | C <sub>93</sub> H <sub>77</sub> O <sub>37</sub> N <sub>3</sub><br>Sm <sub>4</sub> | C <sub>93</sub> H <sub>77</sub> O <sub>37</sub> N <sub>3</sub><br>Eu <sub>4</sub> | C <sub>93</sub> H <sub>77</sub> O <sub>37</sub> N <sub>3</sub><br>Gd <sub>4</sub> | C <sub>93</sub> H <sub>77</sub> O <sub>37</sub> N <sub>3</sub><br>Tb <sub>4</sub> | C <sub>93</sub> H <sub>77</sub> O <sub>37</sub> N <sub>3</sub><br>Dy <sub>4</sub> |
| formula weight                          | 2405.51                                                                           | 2429.99                                                                           | 2436.43                                                                           | 2457.55                                                                           | 2464.27                                                                           | 2478.55                                                                           |
| T (K)                                   | 296(2)                                                                            | 296(2)                                                                            | 296(2)                                                                            | 296(2)                                                                            | 296(2)                                                                            | 296(2)                                                                            |
| crystal system                          | Triclinic                                                                         | Triclinic                                                                         | Triclinic                                                                         | Triclinic                                                                         | Triclinic                                                                         | Triclinic                                                                         |
| space group                             | <i>P</i> -1                                                                       |
| a (Å)                                   | 14.708(3)                                                                         | 14.604(3)                                                                         | 14.589(2)                                                                         | 14.626(7)                                                                         | 15.089(6)                                                                         | 15.189(3)                                                                         |
| b (Å)                                   | 15.429(3)                                                                         | 15.309(3)                                                                         | 15.285(2)                                                                         | 15.297(7)                                                                         | 15.275(6)                                                                         | 15.232(2)                                                                         |
| c (Å)                                   | 23.084(4)                                                                         | 22.870(5)                                                                         | 22.758(3)                                                                         | 23.009(10)                                                                        | 23.654(10)                                                                        | 23.855(4)                                                                         |
| <i>a</i> (deg)                          | 84.282(3)                                                                         | 84.603(3)                                                                         | 84.679(3)                                                                         | 84.817(6)                                                                         | 85.902(7)                                                                         | 85.890(3)                                                                         |
| <i>β</i> (deg)                          | 82.619(3)                                                                         | 83.640(3)                                                                         | 84.323(3)                                                                         | 83.605(6)                                                                         | 81.506(7)                                                                         | 79.971(3)                                                                         |
| <i>γ</i> (deg)                          | 86.756(3)                                                                         | 86.655(3)                                                                         | 86.396(3)                                                                         | 86.488(6)                                                                         | 86.813(8)                                                                         | 86.842(3)                                                                         |
| V (Å <sup>3</sup> )                     | 5164.1(17)                                                                        | 5053.2(18)                                                                        | 5020.8(12)                                                                        | 5088(4)                                                                           | 5373(4)                                                                           | 5415.7(16)                                                                        |
| Z                                       | 2                                                                                 | 2                                                                                 | 2                                                                                 | 2                                                                                 | 2                                                                                 | 2                                                                                 |
| D calcd (g cm <sup>-3</sup> )           | 1.418                                                                             | 1.465                                                                             | 1.479                                                                             | 1.473                                                                             | 1.365                                                                             | 1.363                                                                             |
| μ/mm <sup>-1</sup>                      | 2.049                                                                             | 2.363                                                                             | 2.537                                                                             | 2.645                                                                             | 2.667                                                                             | 2.793                                                                             |
| F (000)                                 | 2164                                                                              | 2180                                                                              | 2188                                                                              | 2196                                                                              | 2144                                                                              | 2152                                                                              |
| GOF                                     | 1.004                                                                             | 0.992                                                                             | 0.986                                                                             | 0.983                                                                             | 1.017                                                                             | 1.005                                                                             |
| R1 [I > 2σ(I)] <sup>a</sup>             | 0.0403                                                                            | 0.0527                                                                            | 0.0652                                                                            | 0.0475                                                                            | 0.0752                                                                            | 0.0562                                                                            |
| ωR <sub>2</sub> (all data) <sup>b</sup> | 0.0843                                                                            | 0.1092                                                                            | 0.1246                                                                            | 0.0977                                                                            | 0.1616                                                                            | 0.1221                                                                            |
| Data/restraints/para<br>meters          | 18075 / 2 /<br>1120                                                               | 18248 / 1 /<br>1119                                                               | 18014 / 6 /<br>1104                                                               | 18364 / 1 /<br>1119                                                               | 18750 / 5 / 1081                                                                  | 18940 / 0 / 1081                                                                  |
| CCDC number                             | 1407369                                                                           | 1407370                                                                           | 1407371                                                                           | 1407372                                                                           | 1407373                                                                           | 1407374                                                                           |

**Table S2. Crystal Data and Structure Refinement Summary for compounds 7–8**

| complex                                      | 7                                                                              | 8                                                                              |
|----------------------------------------------|--------------------------------------------------------------------------------|--------------------------------------------------------------------------------|
| empirical formula                            | C <sub>93</sub> H <sub>81</sub> O <sub>39</sub> N <sub>3</sub> Tb <sub>4</sub> | C <sub>93</sub> H <sub>81</sub> O <sub>39</sub> N <sub>3</sub> Dy <sub>4</sub> |
| formula weight                               | 2500.29                                                                        | 2514.57                                                                        |
| T (K)                                        | 296(2)                                                                         | 296(2)                                                                         |
| crystal system                               | Triclinic                                                                      | Triclinic                                                                      |
| space group                                  | <i>P</i> 2 <sub>1</sub> / <i>n</i>                                             | <i>P</i> 2 <sub>1</sub> / <i>n</i>                                             |
| a (Å)                                        | 15.9451(14)                                                                    | 15.970(4)                                                                      |
| b (Å)                                        | 28.148(3)                                                                      | 28.166(7)                                                                      |
| c (Å)                                        | 23.416(2)                                                                      | 23.583(6)                                                                      |
| <i>a</i> (deg)                               | 90                                                                             | 90                                                                             |
| <i>β</i> (deg)                               | 107.837(2)                                                                     | 108.092(3)                                                                     |
| <i>γ</i> (deg)                               | 90                                                                             | 90                                                                             |
| V (Å <sup>3</sup> )                          | 10004.5(16)                                                                    | 10083(4)                                                                       |
| Z                                            | 4                                                                              | 4                                                                              |
| D calcd (g cm <sup>-3</sup> )                | 1.515                                                                          | 1.513                                                                          |
| <i>μ</i> /mm <sup>-1</sup>                   | 2.868                                                                          | 3.004                                                                          |
| F (000)                                      | 4448                                                                           | 4464                                                                           |
| GOF                                          | 1.066                                                                          | 1.090                                                                          |
| R1 [ <i>I</i> > 2σ( <i>I</i> )] <sup>a</sup> | 0.0348                                                                         | 0.0476                                                                         |
| ωR <sub>2</sub> (all data) <sup>b</sup>      | 0.0705                                                                         | 0.1089                                                                         |
| Data/restraints/para<br>meters               | 17607 / 3 / 1118                                                               | 18257 / 5 / 1113                                                               |
| CCDC number                                  | 1407375                                                                        | 1407376                                                                        |

$$^a R_1 = \sum ||F_o| - |F_c|| / \sum |F_o|, \quad ^b wR_2 = \{ \sum [w(F_o^2 - F_c^2)^2] / \sum (F_o^2)^2 \}^{1/2}$$

(3) Figures of the metal- chains and two-dimensional layer structures in 1 and 7

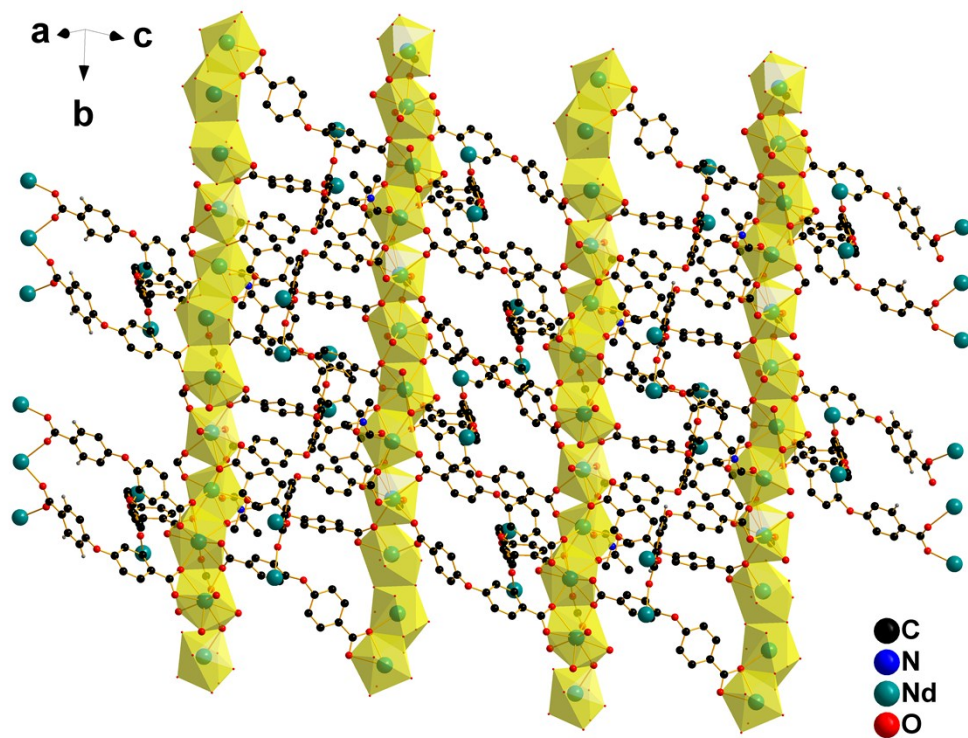

Figure. S1 The metal- chains and two-dimensional layer structures in 1.

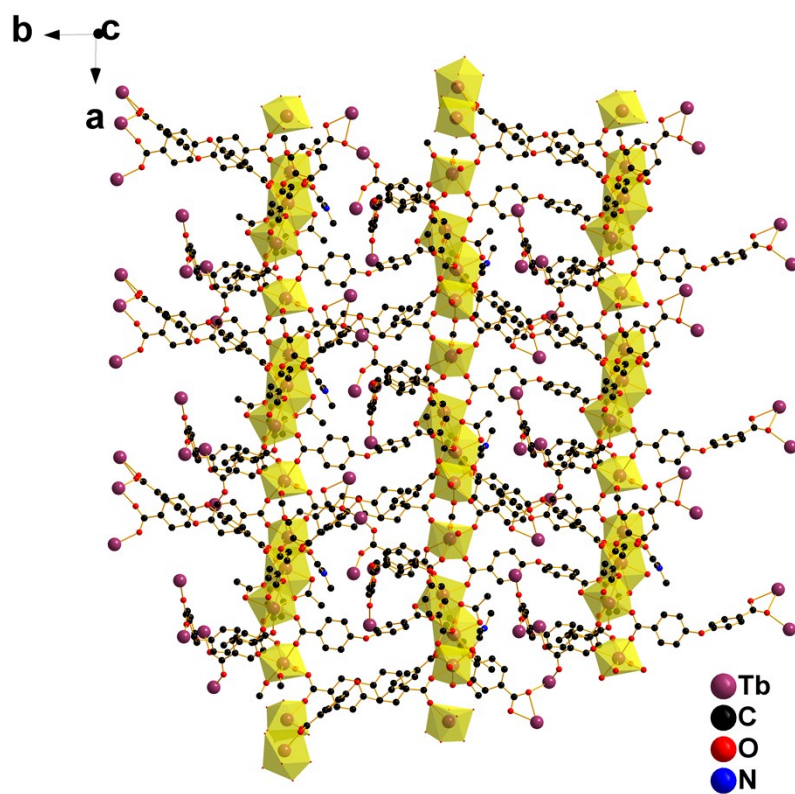

Figure. S2 The metal- chains and two-dimensional layer structures in 7.

**Table S3. Selected bond lengths (Å) for complexes 1, 2, 5, 6, 7 and 8**

| <b>1</b>       |          | <b>2</b>       |           |
|----------------|----------|----------------|-----------|
| Nd(1)-O(4)#2   | 2.372(8) | Sm(1)-O(5)#6   | 2.254(10) |
| Nd(1)-O(15)#3  | 2.375(7) | Sm(1)-O(30)#7  | 2.314(9)  |
| Nd(1)-O(30)#4  | 2.431(7) | Sm(1)-O(20)#7  | 2.339(10) |
| Nd(1)-O(25)#1  | 2.447(6) | Sm(1)-O(9)#2   | 2.365(8)  |
| Nd(1)-O(31W)   | 2.480(8) | Sm(1)-O(6)     | 2.437(9)  |
| Nd(1)-O(1)     | 2.501(7) | Sm(1)-O(1)     | 2.508(10) |
| Nd(1)-O(6)     | 2.555(7) | Sm(1)-O(2)     | 2.648(9)  |
| Nd(1)-O(2)     | 2.703(6) | Sm(1)-O(7)     | 2.717(8)  |
| Nd(1)-O(24)#1  | 2.842(7) | Sm(2)-O(19)#7  | 2.299(10) |
| Nd(2)-O(14)#3  | 2.388(7) | Sm(2)-O(31DMF) | 2.368(12) |
| Nd(2)-O(2)     | 2.399(6) | Sm(2)-O(2)     | 2.370(8)  |
| Nd(2)-O(10)#1  | 2.413(7) | Sm(2)-O(21)    | 2.392(9)  |
| Nd(2)-O(16)    | 2.429(7) | Sm(2)-O(16)    | 2.404(10) |
| Nd(2)-O(11)    | 2.514(7) | Sm(2)-O(7)     | 2.407(9)  |
| Nd(2)-O(6)     | 2.520(6) | Sm(2)-O(11)    | 2.509(9)  |
| Nd(2)-O(7)     | 2.563(7) | Sm(2)-O(12)    | 2.590(8)  |
| Nd(2)-O(12)    | 2.609(7) | Sm(3)-O(26)    | 2.358(8)  |
| Nd(2)-O(17)    | 2.764(8) | Sm(3)-O(25)#3  | 2.365(9)  |
| Nd(3)-O(20)#5  | 2.367(8) | Sm(3)-O(12)    | 2.397(8)  |
| Nd(3)-O(32DMF) | 2.404(9) | Sm(3)-O(17)    | 2.412(9)  |
| Nd(3)-O(21)    | 2.425(7) | Sm(3)-O(22)    | 2.474(8)  |
| Nd(3)-O(26)    | 2.428(7) | Sm(3)-O(14)#1  | 2.475(8)  |
| Nd(3)-O(17)    | 2.440(8) | Sm(3)-O(15)#1  | 2.526(9)  |
| Nd(3)-O(12)    | 2.441(7) | Sm(3)-O(21)    | 2.589(8)  |
| Nd(3)-O(9)#1   | 2.546(7) | Sm(3)-O(16)    | 2.725(10) |
| Nd(3)-O(10)#1  | 2.598(6) | Sm(4)-O(29)#4  | 2.356(10) |
| Nd(4)-O(29)#6  | 2.286(8) | Sm(4)-O(24)#3  | 2.372(10) |
| Nd(4)-O(5)#5   | 2.339(7) | Sm(4)-O(4)#5   | 2.407(9)  |
| Nd(4)-O(19)#5  | 2.381(8) | Sm(4)-O(10)#1  | 2.415(8)  |
| Nd(4)-O(24)#7  | 2.399(7) | Sm(4)-O(32W)   | 2.440(10) |
| Nd(4)-O(22)    | 2.476(7) | Sm(4)-O(27)    | 2.500(9)  |
| Nd(4)-O(27)    | 2.541(7) | Sm(4)-O(14)#1  | 2.528(9)  |
| Nd(4)-O(26)    | 2.635(7) | Sm(4)-O(26)    | 2.662(8)  |
| Nd(4)-O(21)    | 2.716(7) | Sm(4)-O(9)#1   | 2.813(9)  |

| 5             |           | 6             |           |
|---------------|-----------|---------------|-----------|
| Tb(1)-O(27)#9 | 2.261(18) | Dy(1)-O(5)#2  | 2.208(13) |
| Tb(1)-O(6)    | 2.295(14) | Dy(1)-O(11)   | 2.253(10) |
| Tb(1)-O(24)#5 | 2.305(12) | Dy(1)-O(9)#3  | 2.255(9)  |
| Tb(1)-O(4)#2  | 2.315(12) | Dy(1)-O(30)#4 | 2.276(10) |
| Tb(1)-O(1)    | 2.400(14) | Dy(1)-O(6)    | 2.406(11) |
| Tb(1)-O(30)#8 | 2.444(15) | Dy(1)-O(1)    | 2.428(12) |
| Tb(1)-O(29)#8 | 2.593(17) | Dy(1)-O(2)    | 2.573(13) |
| Tb(1)-O(2)    | 2.733(14) | Dy(1)-O(7)    | 2.693(11) |
| Tb(2)-O(10)#5 | 2.296(19) | Dy(2)-O(15)#4 | 2.257(16) |
| Tb(2)-O(7)    | 2.339(16) | Dy(2)-O(12)   | 2.323(12) |
| Tb(2)-O(2)    | 2.354(18) | Dy(2)-O(7)    | 2.333(11) |
| Tb(2)-O(11)   | 2.386(12) | Dy(2)-O(2)    | 2.346(11) |
| Tb(2)-O(29)#8 | 2.390(14) | Dy(2)-O(16)   | 2.349(10) |
| Tb(2)-O(31W)  | 2.41(2)   | Dy(2)-O(31W)  | 2.404(17) |
| Tb(2)-O(20)#7 | 2.470(13) | Dy(2)-O(25)#1 | 2.412(11) |
| Tb(2)-O(19)#7 | 2.624(14) | Dy(2)-O(24)#1 | 2.799(14) |
| Tb(3)-O(9)#5  | 2.289(16) | Dy(3)-O(14)#4 | 2.251(13) |
| Tb(3)-O(15)#6 | 2.305(13) | Dy(3)-O(20)#5 | 2.283(10) |
| Tb(3)-O(21)   | 2.341(12) | Dy(3)-O(24)#1 | 2.298(11) |
| Tb(3)-O(19)#7 | 2.368(12) | Dy(3)-O(26)   | 2.310(11) |
| Tb(3)-O(12)   | 2.446(12) | Dy(3)-O(17)   | 2.382(10) |
| Tb(3)-O(17)   | 2.496(12) | Dy(3)-O(21)   | 2.502(11) |
| Tb(3)-O(16)   | 2.528(12) | Dy(3)-O(22)   | 2.504(10) |
| Tb(3)-O(11)   | 2.545(13) | Dy(3)-O(16)   | 2.584(12) |
| Tb(4)-O(25)#4 | 2.312(14) | Dy(4)-O(29)#6 | 2.274(11) |
| Tb(4)-O(14)#6 | 2.334(14) | Dy(4)-O(19)#5 | 2.324(12) |
| Tb(4)-O(5)#7  | 2.363(12) | Dy(4)-O(10)#1 | 2.325(10) |
| Tb(4)-O(26)   | 2.370(13) | Dy(4)-O(32W)  | 2.344(12) |
| Tb(4)-O(22)   | 2.453(14) | Dy(4)-O(4)#7  | 2.357(10) |
| Tb(4)-O(17)   | 2.476(12) | Dy(4)-O(27)   | 2.402(11) |
| Tb(4)-O(32W)  | 2.360(17) | Dy(4)-O(22)   | 2.444(9)  |
| Tb(4)-O(21)   | 2.674(12) | Dy(4)-O(26)   | 2.714(11) |

**7**

---

|                |             |
|----------------|-------------|
| 0(2)-Tb(1)     | 2. 233 (7)  |
| 0(5)-Tb(1)#1   | 2. 404 (6)  |
| 0(6)-Tb(1)     | 2. 417 (6)  |
| 0(11)-Tb(1)    | 2. 459 (6)  |
| 0(14)-Tb(1)#1  | 2. 286 (7)  |
| 0(29)-Tb(1)#7  | 2. 341 (6)  |
| 0(31W)-Tb(1)   | 2. 61 (2)   |
| 0(33DMF)-Tb(1) | 2. 417 (8)  |
| 0(4)-Tb(2)#1   | 2. 423 (6)  |
| 0(5)-Tb(2)#1   | 2. 493 (6)  |
| 0(7)-Tb(2)     | 2. 301 (6)  |
| 0(11)-Tb(2)    | 2. 508 (6)  |
| 0(12)-Tb(2)    | 2. 387 (6)  |
| 0(16)-Tb(2)    | 2. 352 (6)  |
| 0(19)-Tb(2)#2  | 2. 393 (7)  |
| 0(20)-Tb(2)#2  | 2. 612 (6)  |
| 0(25)-Tb(2)#3  | 2. 336 (6)  |
| 0(9)-Tb(3)#5   | 2. 283 (7)  |
| 0(16)-Tb(3)    | 2. 603 (6)  |
| 0(17)-Tb(3)    | 2. 362 (7)  |
| 0(20)-Tb(3)#2  | 2. 358 (6)  |
| 0(21)-Tb(3)    | 2. 328 (6)  |
| 0(24)-Tb(3)#3  | 2. 507 (7)  |
| 0(25)-Tb(3)#3  | 2. 525 (6)  |
| 0(26)-Tb(3)    | 2. 221 (7)  |
| 0(1)-Tb(4)#4   | 2. 272 (7)  |
| 0(10)-Tb(4)#5  | 2. 327 (8)  |
| 0(15)-Tb(4)#6  | 2. 316 (7)  |
| 0(22)-Tb(4)    | 2. 272 (7)  |
| 0(27)-Tb(4)    | 2. 392 (7)  |
| 0(30)-Tb(4)#8  | 2. 267 (8)  |
| 0(32W)-Tb(4)   | 2. 414 (13) |

---

**8**

---

|                |           |
|----------------|-----------|
| Dy(1)-O(2)     | 2.233(4)  |
| Dy(1)-O(14)#4  | 2.286(4)  |
| Dy(1)-O(29)#5  | 2.338(3)  |
| Dy(1)-O(6)     | 2.402(3)  |
| Dy(1)-O(5)#4   | 2.404(3)  |
| Dy(1)-O(33DMF) | 2.406(4)  |
| Dy(1)-O(11)    | 2.464(3)  |
| Dy(1)-O(31W)   | 2.588(11) |
| Dy(2)-O(7)     | 2.280(4)  |
| Dy(2)-O(25)#6  | 2.343(3)  |
| Dy(2)-O(16)    | 2.351(4)  |
| Dy(2)-O(19)#7  | 2.390(3)  |
| Dy(2)-O(12)    | 2.392(3)  |
| Dy(2)-O(4)#4   | 2.427(3)  |
| Dy(2)-O(5)#4   | 2.489(3)  |
| Dy(2)-O(11)    | 2.507(3)  |
| Dy(2)-O(20)#7  | 2.584(3)  |
| Dy(3)-O(26)    | 2.212(4)  |
| Dy(3)-O(9)#8   | 2.278(4)  |
| Dy(3)-O(21)    | 2.317(4)  |
| Dy(3)-O(17)    | 2.347(4)  |
| Dy(3)-O(20)#7  | 2.350(4)  |
| Dy(3)-O(24)#6  | 2.504(4)  |
| Dy(3)-O(25)#6  | 2.518(4)  |
| Dy(3)-O(16)    | 2.608(3)  |
| Dy(4)-O(30)#9  | 2.253(5)  |
| Dy(4)-O(22)    | 2.264(3)  |
| Dy(4)-O(1)#10  | 2.273(4)  |
| Dy(4)-O(15)#3  | 2.318(4)  |
| Dy(4)-O(10)#8  | 2.330(4)  |
| Dy(4)-O(27)    | 2.376(4)  |
| Dy(4)-O(32W)   | 2.417(7)  |

---



**(4) TG/DTA curves for 1-8**

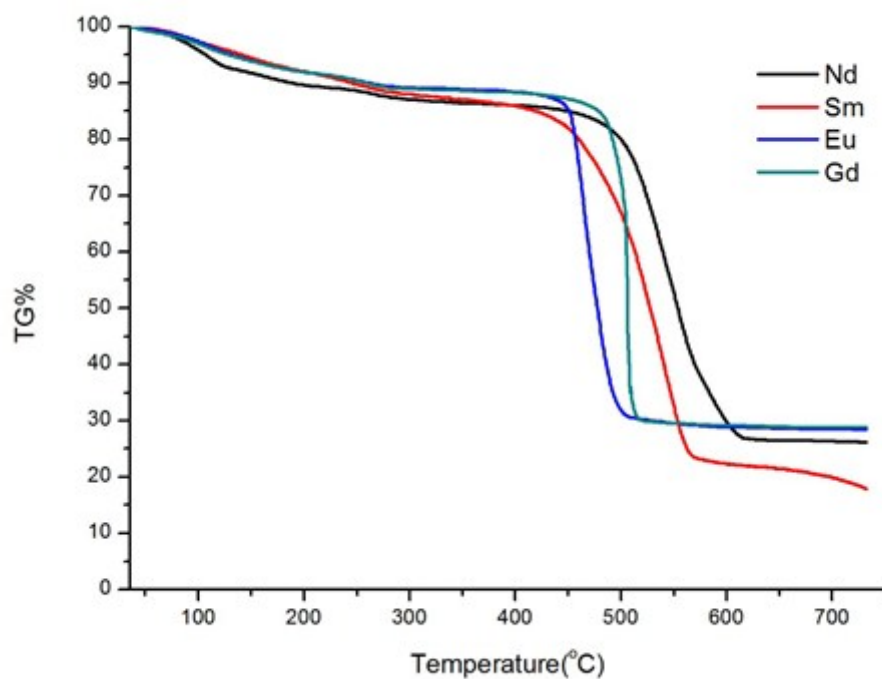

**Figure S3.**The TGA plots of **1, 2, 3** and **4**

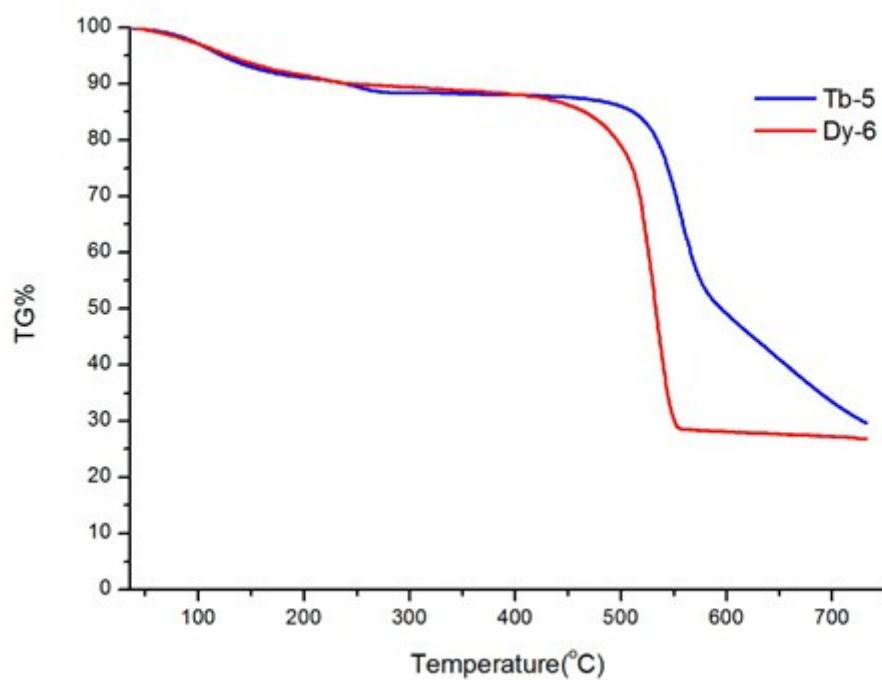

**Figure S4.**The TGA plots of **5** and **6**

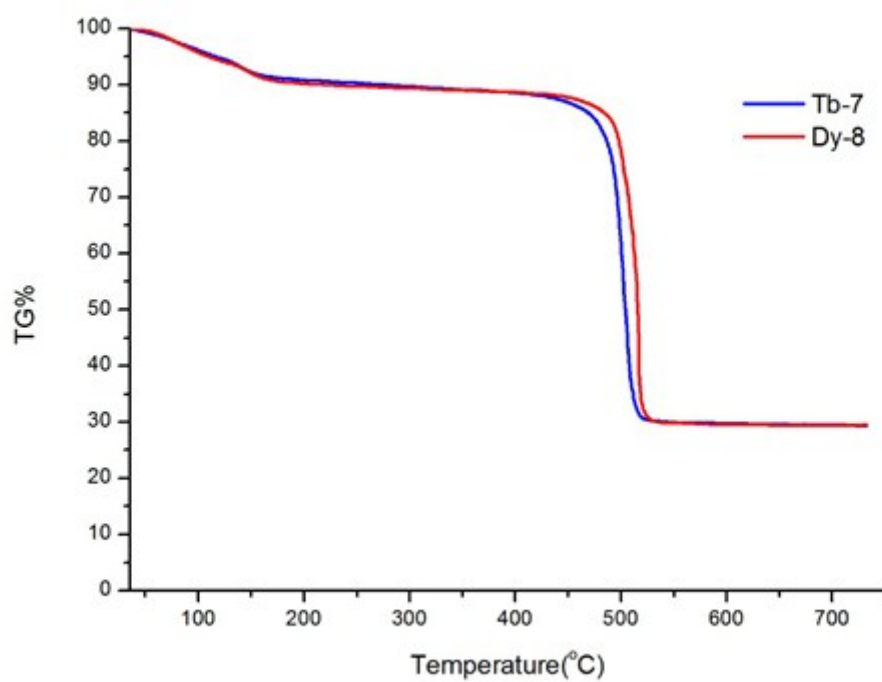

**Figure S5.**The TGA plots of **7** and **8**

**(5) IR of 1-8**

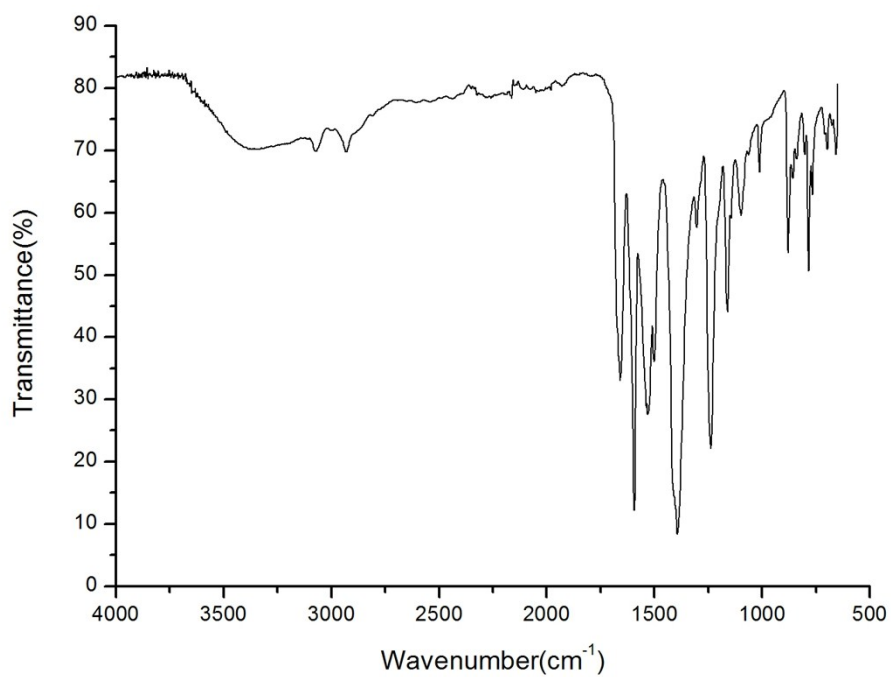

**Figure S6.**IR spectrum of complex **1**

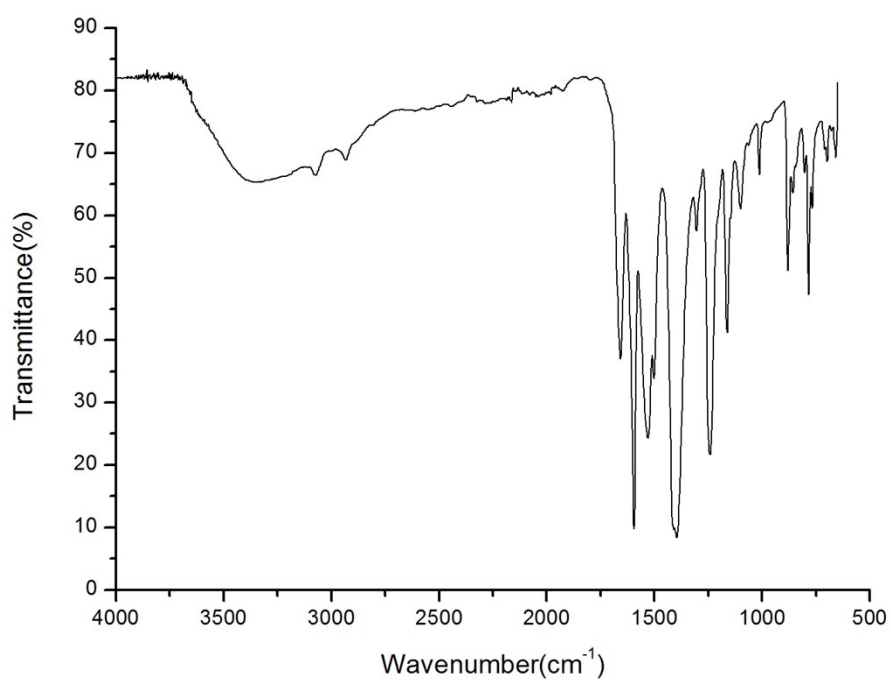

**Figure S7.** IR spectrum of complex **2**

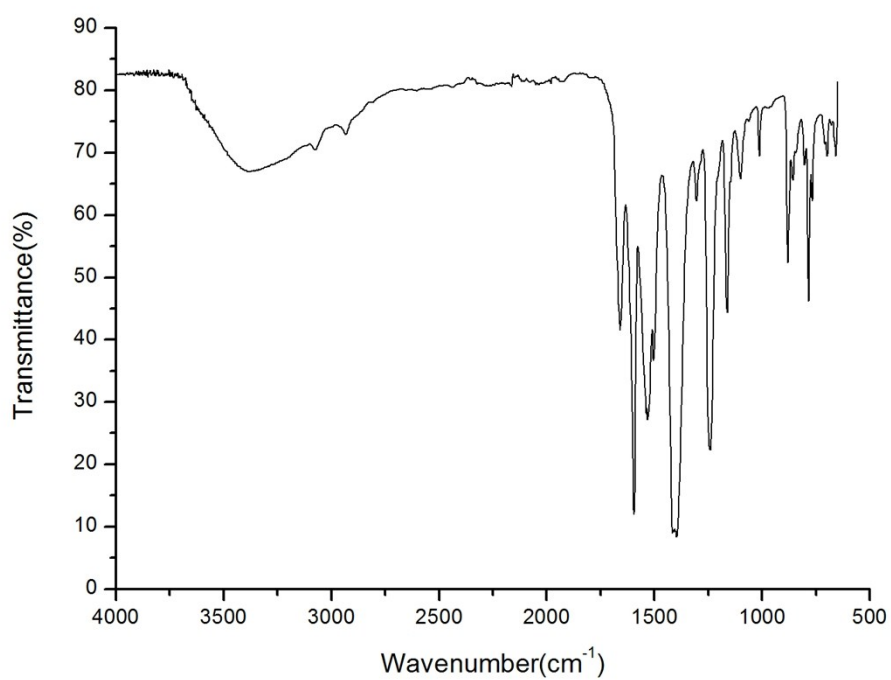

**Figure S8.** IR spectrum of complex **3**

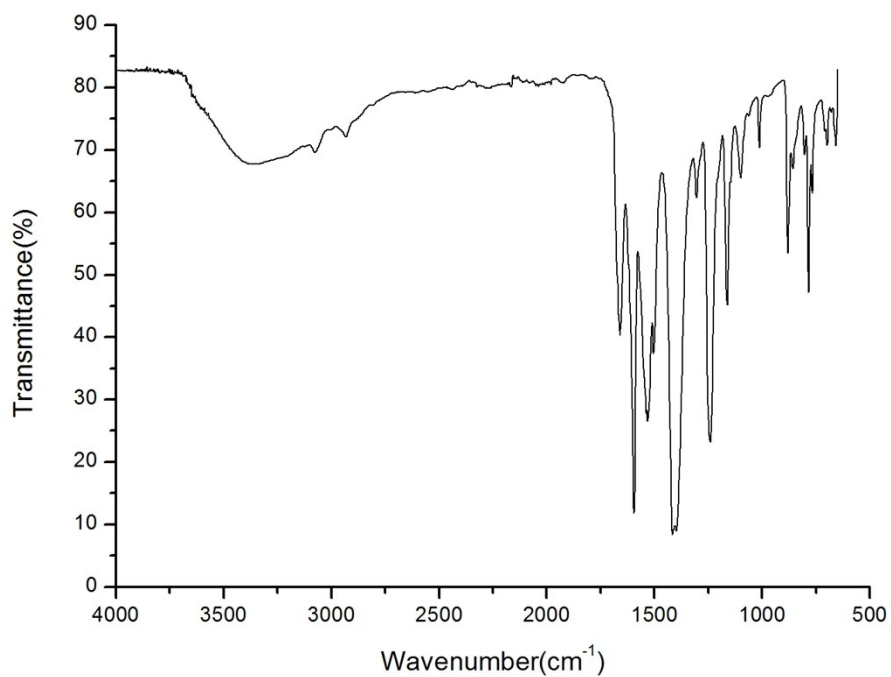

**Figure S9.**IR spectrum of complex 4

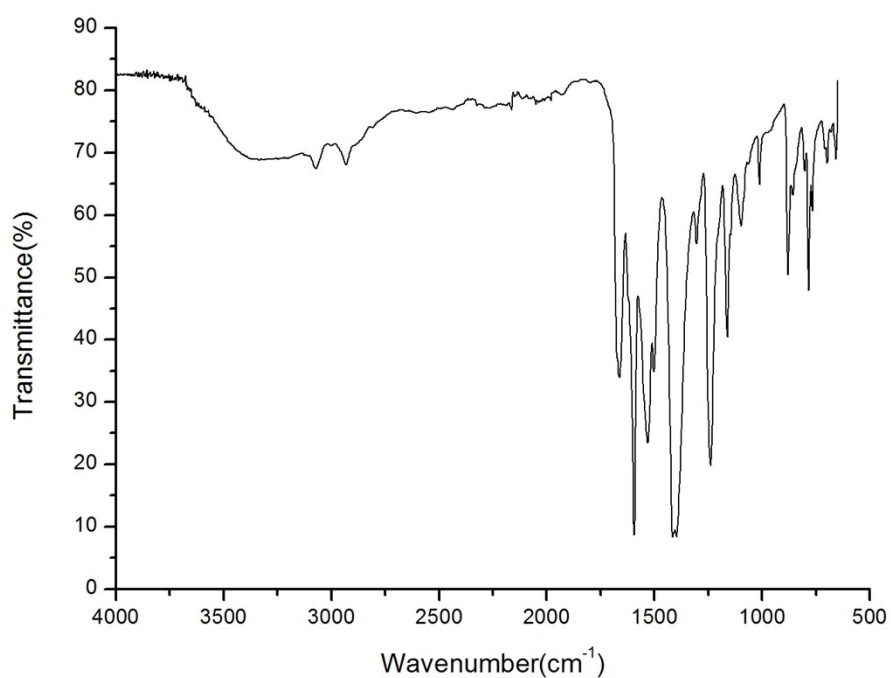

**Figure S10.**IR spectrum of complex 5

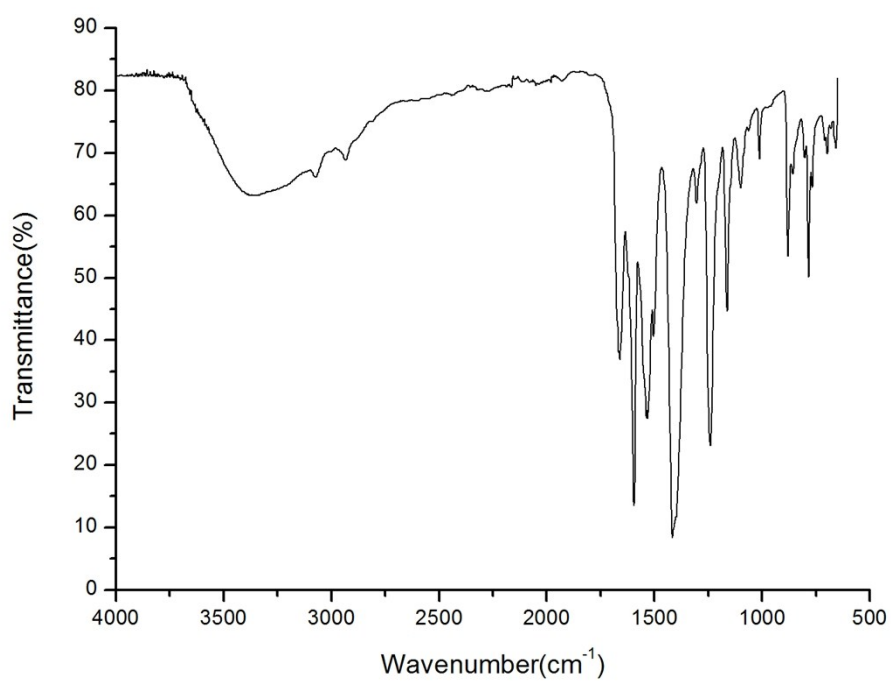

**Figure S11.** IR spectrum of complex 6

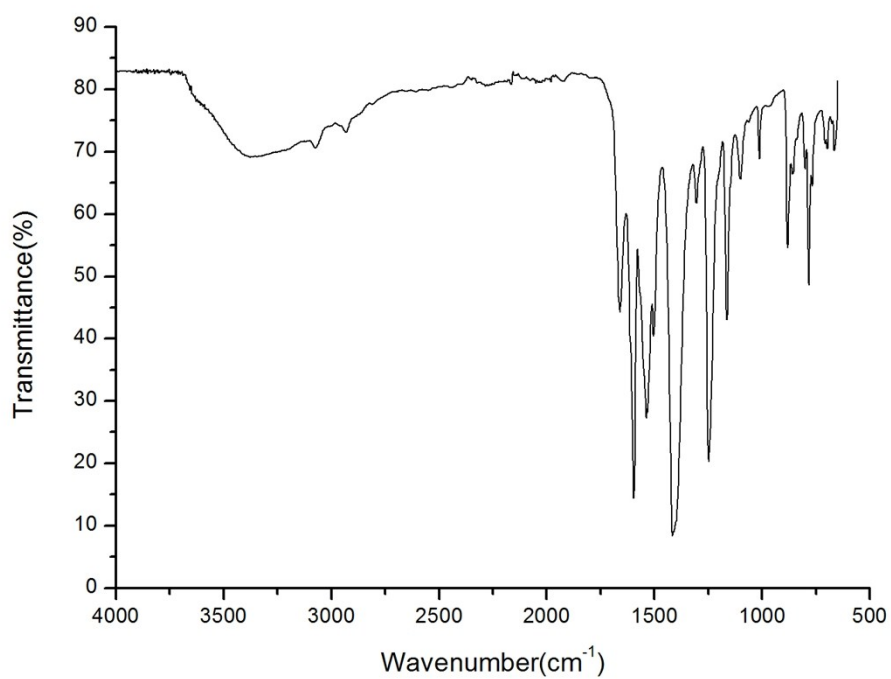

**Figure S12.** IR spectrum of complex 7

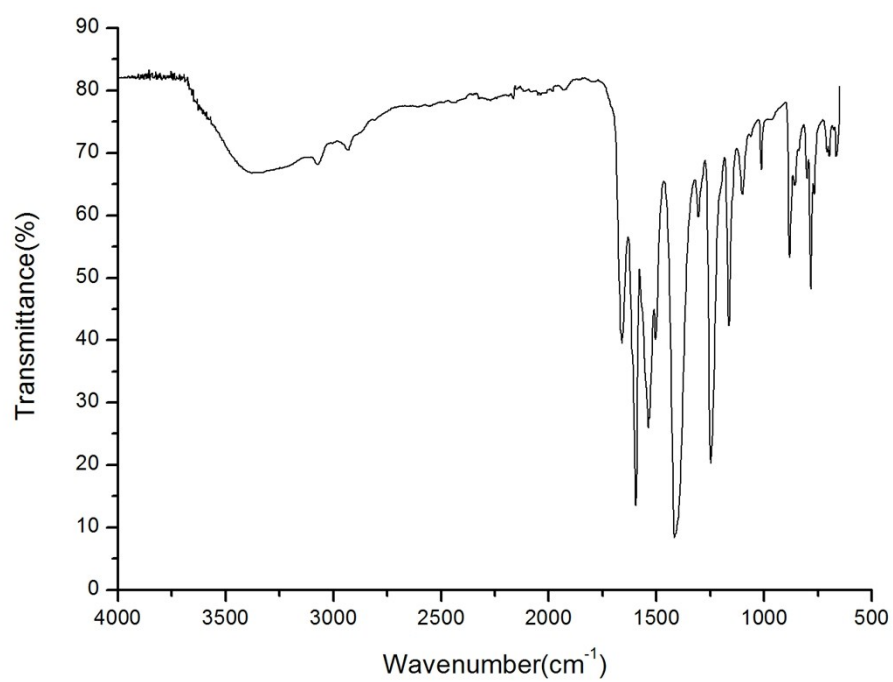

**Figure S13.**IR spectrum of complex **8**
